# Supplementary material
Source: Springer Nature journal article supplement (https://www.springermedizin.de/resource/supplementary/12936_2013_2883_MOESM8_ESM.pdf/9544476)
Supplement: MOESM8 [file 9544476]

**Additional file 8. Effects of intervention on clinical malaria incidence rate**

Dependent variable: incidence rate (cases per 1,000 population per month). See Table S3a (Additional file 3) for coding of categorical variables, with Season replaced by prior- and post-intervention (post ICON) only.

**2010 data**

**Table S8a.** Analysis of variance – full model.

| Source               | SS      | df | MS      | F       | P     |
|----------------------|---------|----|---------|---------|-------|
| CONSTANT             | 876.413 | 1  | 876.413 | 110.683 | 0.000 |
| SITE                 | 149.940 | 2  | 74.970  | 9.468   | 0.000 |
| SEASON               | 87.900  | 1  | 87.900  | 11.101  | 0.001 |
| ICON                 | 7.356   | 1  | 7.356   | 0.929   | 0.338 |
| ITN                  | 19.032  | 1  | 19.032  | 2.404   | 0.126 |
| SITE*SEASON          | 58.284  | 2  | 29.142  | 3.680   | 0.030 |
| SITE*ICON            | 253.529 | 2  | 126.765 | 16.009  | 0.000 |
| SITE*ITN             | 6.566   | 2  | 3.283   | 0.415   | 0.662 |
| SEASON*ICON          | 13.022  | 1  | 13.022  | 1.645   | 0.204 |
| SEASON*ITN           | 0.148   | 1  | 0.148   | 0.019   | 0.891 |
| ICON*ITN             | 2.364   | 1  | 2.364   | 0.299   | 0.587 |
| SITE*SEASON*ICON     | 1.594   | 2  | 0.797   | 0.101   | 0.904 |
| SITE*SEASON*ITN      | 13.931  | 2  | 6.966   | 0.880   | 0.419 |
| SITE*ICON*ITN        | 19.685  | 2  | 9.843   | 1.243   | 0.295 |
| SEASON*ICON*ITN      | 17.692  | 1  | 17.692  | 2.234   | 0.139 |
| SITE*SEASON*ICON*ITN | 2.554   | 2  | 1.277   | 0.161   | 0.851 |
| Error                | 554.277 | 70 | 7.918   |         |       |

**Table S8b.** Parasite estimates after backfitting at significance level of 0.05.

| Term                                           | Estimate | Std   |         | Prob> t |
|------------------------------------------------|----------|-------|---------|---------|
|                                                |          | Error | t Ratio |         |
| Intercept                                      | 2.638    | 0.298 | 8.840   | <.0001  |
| Site (Mbale vs. Emutete & Iguhu)               | 1.275    | 0.301 | 4.230   | <.0001  |
| Site (Emutete vs. Iguhu)                       | 0.746    | 0.362 | 2.060   | 0.043   |
| Season (Post)                                  | -0.916   | 0.286 | 3.210   | 0.002   |
| ICON (yes)                                     | -0.331   | 0.292 | 1.130   | 0.260   |
| Site (Mbale vs. Emutete & Iguhu)*Season (Post) | -0.902   | 0.296 | 3.050   | 0.003   |
| Site (Emutete vs. Iguhu)*ICON (yes)            | -2.035   | 0.363 | 5.610   | <.0001  |

## 2011 data

Table S8c. Analysis of variance – full model.

| Source               | SS        | df | MS        | F       | P     |
|----------------------|-----------|----|-----------|---------|-------|
| CONSTANT             | 20304.695 | 1  | 20304.695 | 157.800 | 0.000 |
| SITE                 | 15990.389 | 2  | 7995.194  | 62.136  | 0.000 |
| SEASON               | 7206.567  | 1  | 7206.567  | 56.007  | 0.000 |
| ICON                 | 0.151     | 1  | 0.151     | 0.001   | 0.973 |
| ITN                  | 1965.002  | 1  | 1965.002  | 15.271  | 0.000 |
| SITE*SEASON          | 11280.443 | 2  | 5640.222  | 43.834  | 0.000 |
| SITE*ICON            | 14.262    | 2  | 7.131     | 0.055   | 0.946 |
| SITE*ITN             | 7160.870  | 2  | 3580.435  | 27.826  | 0.000 |
| SEASON*ICON          | 8.599     | 1  | 8.599     | 0.067   | 0.797 |
| SEASON*ITN           | 9144.990  | 1  | 9144.990  | 71.071  | 0.000 |
| ICON*ITN             | 1.773     | 1  | 1.773     | 0.014   | 0.907 |
| SITE*SEASON*ICON     | 59.755    | 1  | 59.755    | 0.464   | 0.498 |
| SITE*SEASON*ITN      | 10656.964 | 2  | 5328.482  | 41.411  | 0.000 |
| SITE*ICON*ITN        | 76.712    | 1  | 76.712    | 0.596   | 0.443 |
| SEASON*ICON*ITN      | 59.057    | 1  | 59.057    | 0.459   | 0.501 |
| SITE*SEASON*ICON*ITN | 91.549    | 2  | 45.775    | 0.356   | 0.702 |
| Error                | 6948.367  | 54 | 128.673   |         |       |

Table S8d. Parameter estimates after backfitting selection at significance level of 0.05.

| Term                                                         | Estimate | Std   |         | Prob> t |
|--------------------------------------------------------------|----------|-------|---------|---------|
|                                                              |          | Error | t Ratio |         |
| Intercept                                                    | 34.450   | 2.171 | 15.870  | <.0001  |
| Site (Iguhu & Emutete vs. Emakakha)                          | 27.149   | 2.171 | 12.500  | <.0001  |
| Site (Iguhu vs. Emutete)                                     | 0.704    | 1.451 | 0.490   | 0.629   |
| Season (Post)                                                | 11.334   | 1.466 | 7.730   | <.0001  |
| ITN (yes)                                                    | 4.685    | 1.472 | 3.180   | 0.002   |
| Site (Iguhu & Emutete vs. Emakakha)*Season (Post)            | 23.006   | 2.171 | 0.600   | <.0001  |
| Site (Iguhu vs. Emutete)*Season (Post)                       | -3.805   | 1.451 | 2.620   | 0.011   |
| Site (Iguhu & Emutete vs. Emakakha)*ITN (No)                 | -17.994  | 2.171 | 8.290   | <.0001  |
| Season (Prior)*ITN (yes)                                     | 13.019   | 1.472 | 8.850   | <.0001  |
| Site (Iguhu & Emutete vs. Emakakha)*Season (Prior)*ITN (yes) | -22.658  | 2.171 | 10.430  | <.0001  |
